# Supplementary material
Source: publisher figshare collection journal article supplement (https://acs.figshare.com/ndownloader/files/26657377)
Supplement: Supplementary file 1 [file 26657377]

## Supporting information

# Hexachlorocyclotriphosphazene Functionalized Graphene Oxide as highly Efficient Flame Retardant

*Khaled Rhili<sup>a</sup>, SihamChergui<sup>a</sup>, Ahmad Samih ElDouhaibi<sup>b</sup>, and Mohamed Siaj<sup>a\*</sup>*

<sup>a</sup>Department of Chemistry, University of Quebec at Montreal, Montreal QC, H3C3P8, Canada

<sup>b</sup> Department of Chemistry, Lebanese University, College of Science III, Campus Mont Michel, 1352, Tripoli, Lebanon

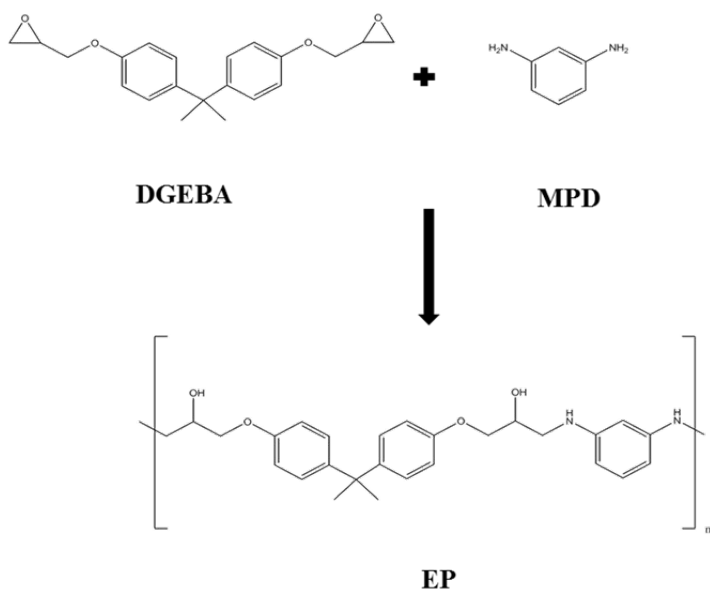

**Figure S1.** Illustration of synthesized thermoset epoxy resin.

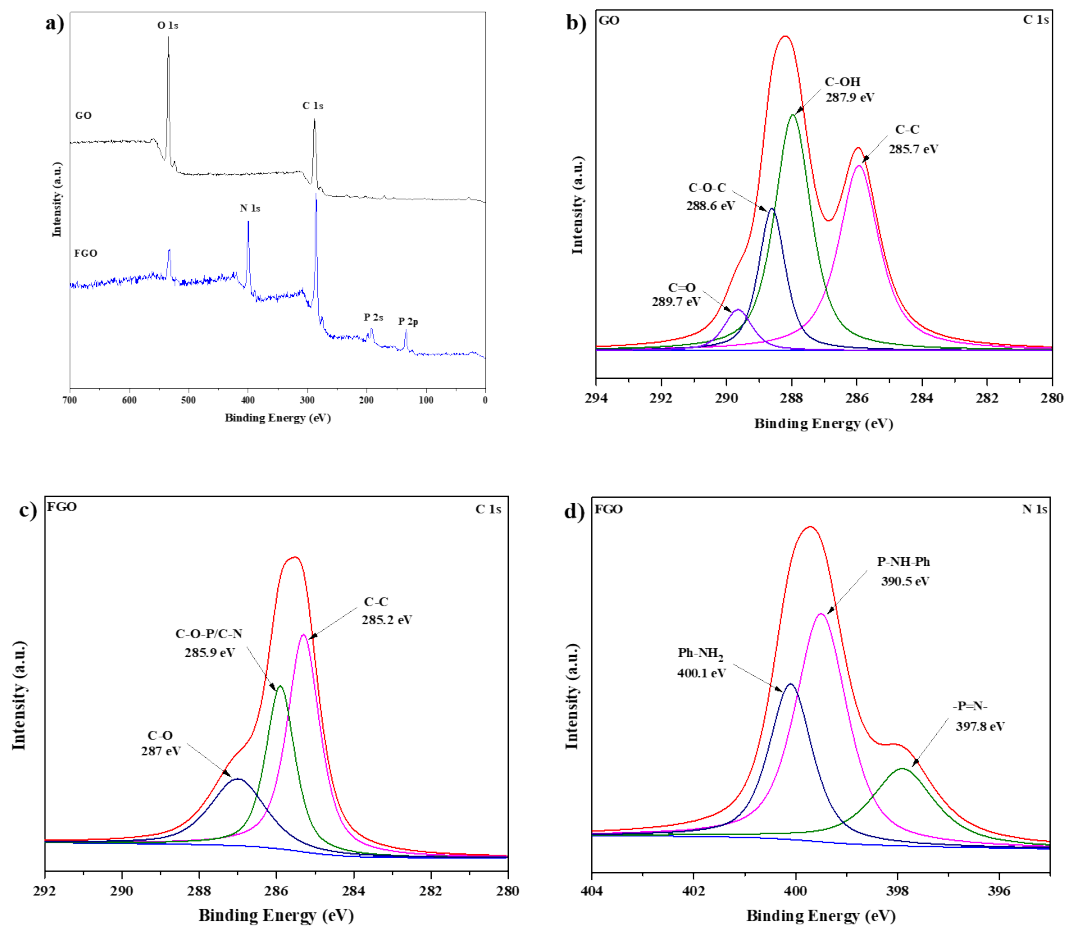

**Figure S2.** a) survey spectra of GO and FGO; (b) C 1s spectrum of GO; (c) C 1s and (d) N 1s spectra of FGO.

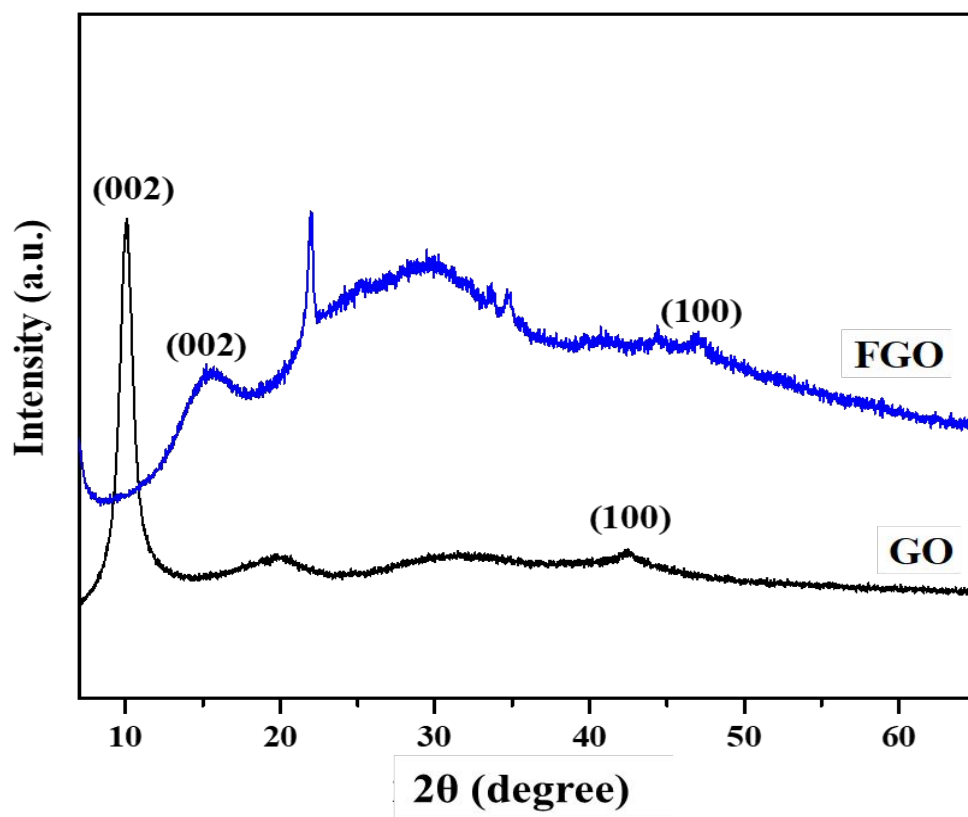

**Figure S3.** XRD spectra of GO and FGO.

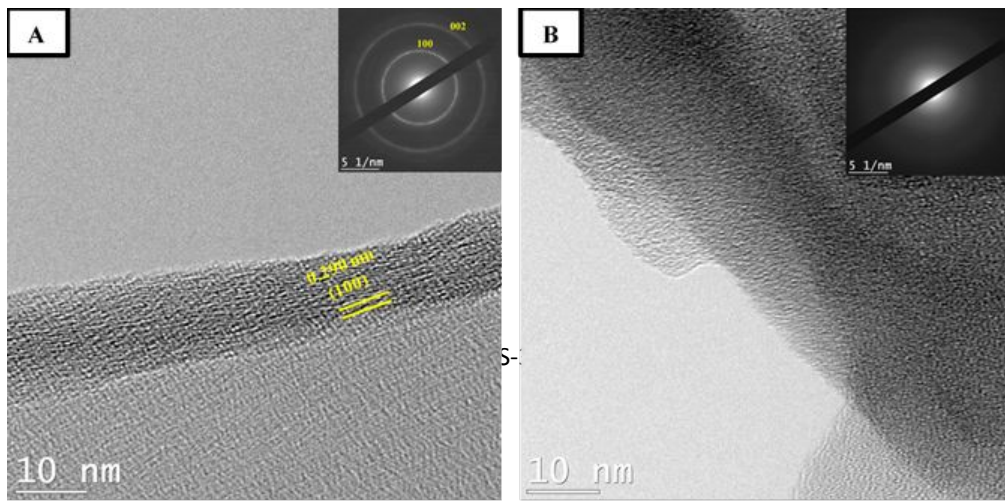

**Figure S4.** High-resolution transmission electron microscopy (HRTEM) image with the corresponding SAED pattern (top insert) of (A) (GO) and (B) (FGO).

**Table S1:** Element content of GO and FGO measured from XPS analysis.

| Samples | C (at.%) | O (at.%) | P (at.%) | N (at.%) |
|---------|----------|----------|----------|----------|
| GO      | 64.3     | 35.7     | -        | -        |
| FGO     | 63.7     | 7.9      | 6.0      | 22.5     |

**Table S2:** Detailed TGA data for EP and its composites under N<sub>2</sub> atmosphere.

| Samples   | T <sub>10</sub> /°C | T <sub>max</sub> (wt%/°C) | Residue at 800 °C (wt%) |
|-----------|---------------------|---------------------------|-------------------------|
| EP        | 370                 | -1.85                     | 14                      |
| EP@GO2%   | 341                 | -1.57                     | 14.7                    |
| EP@FGO2%  | 342                 | -1.36                     | 18.3                    |
| EP@FGO5%  | 350                 | -1.18                     | 20.1                    |
| EP@FGO10% | 317                 | -0.85                     | 23                      |
